# Supplementary material for: Highly Efficient Iron Oxide Nanoparticles Immobilized on Cellulose Nanofibril Aerogels for Arsenic Removal from Water
Source: MDPI journal article supplement (doi:10.3390/nano11112818), 2021-10-23
Supplement: s1 [file s1]

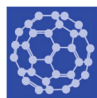

*Supplementary Materials*

# Highly Efficient Iron Oxide Nanoparticles Immobilized on Cellulose Nanofibril Aerogels for Arsenic Removal from Water

Md Musfiquir Rahman <sup>1</sup>, Islam Hafez <sup>1,\*</sup>, Mehdi Tajvidi <sup>1</sup> and Aria Amirbahman <sup>2</sup>

<sup>1</sup> Laboratory of Renewable Nanomaterials, School of Forest Resources, University of Maine, 5755 Nutting Hall, Orono, ME 04469, USA; md.musfiquir.rahman@maine.edu (M.M.R.); mehdi.tajvidi@maine.edu (M.T.)

<sup>2</sup> Department of Civil, Environmental and Sustainable Engineering, Santa Clara University, 500 El Camino Real, Santa Clara, CA 95053, USA; aamirbahman@scu.edu

\* Correspondence: islam.hafez@maine.edu (I.H.)

**Table S1.** Summary of aerogel formulation before and after the incorporation of IONPs.

| Sample Name      | CNF       |                   | IONPs      |                    | Crosslinker (CL)               |                  | Adsorbent               |
|------------------|-----------|-------------------|------------|--------------------|--------------------------------|------------------|-------------------------|
|                  | CNF wt. % | CNF Dry Mass (mg) | IONP wt. % | IONP Dry Mass (mg) | CL wt. %<br>(Based on Dry CNF) | CL Dry Mass (mg) | Adsorbent Dry Mass (mg) |
| CNF Aerogel      | 100       | 35                | 0          | 5                  | 5                              | 0.07             | 35.07                   |
| CNF-IONP Aerogel | 87.5      | 35                | 12.5       | 5                  | 5                              | 0.07             | 40.07                   |

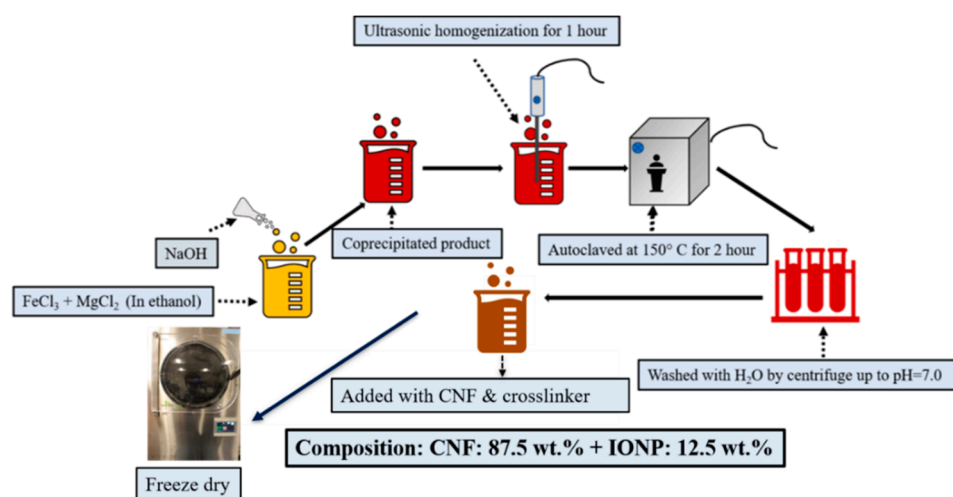

**Figure S1.** The summary of the preparatory scheme for CNF-IONP aerogel.

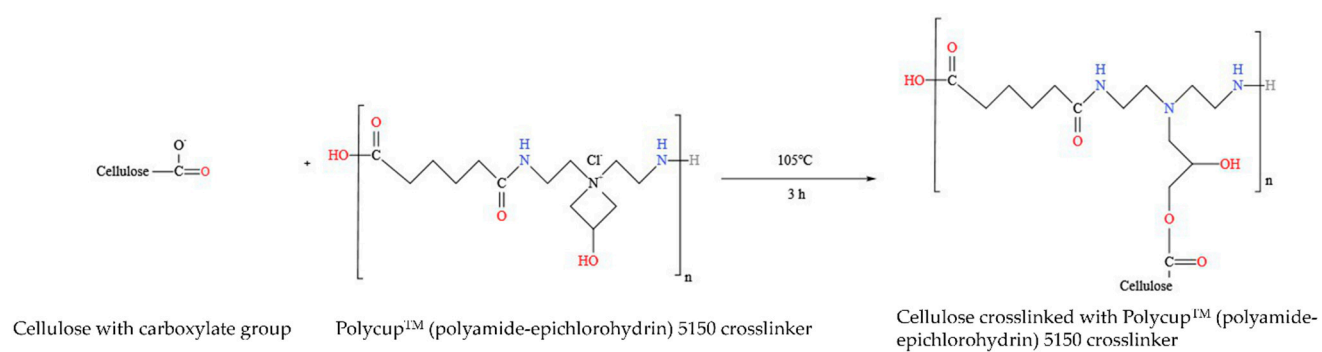

**Figure S2.** Proposed reaction mechanism between cellulose and Polycup™.

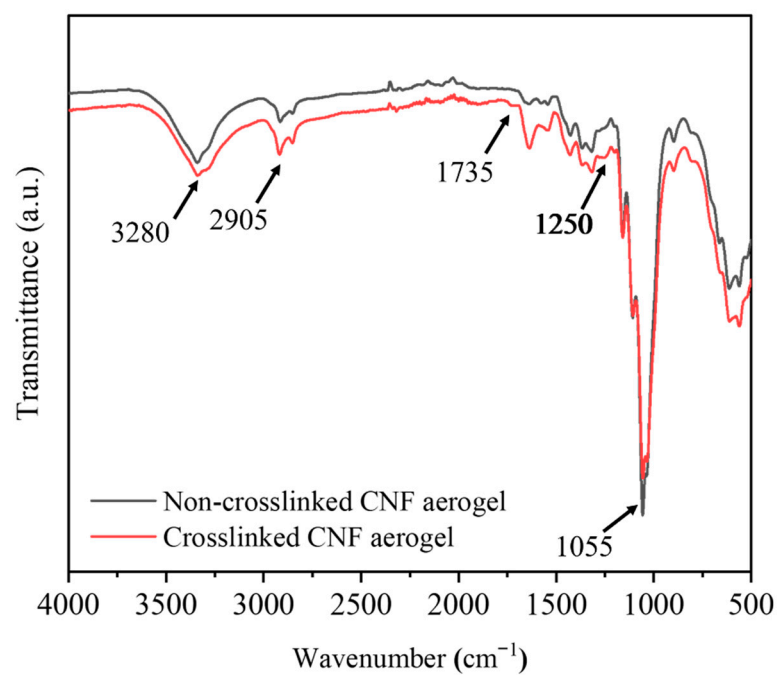

**Figure S3.** The FT-IR spectrum of crosslinked and non-crosslinked CNF aerogel.
